# Supplementary material
Source: PubMed Central journal article supplement (PMC3929422)
Supplement: rna-11-33-s01.pdf [file rna-11-33-s01.pdf]

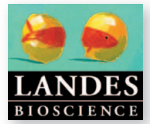

## **Supplemental Material to:**

**Queenie Wing Lei Wong, Li Jia, Ng Sheng Rong,  
Lim Seng Gee, Henry Yang, Leah A Vardy**

**RPL39L is an example of a recently evolved  
ribosomal protein paralog that shows highly  
specific tissue expression patterns and is upregulated  
in ESCs and HCC tumors**

**2013; 11(1)**

**<http://dx.doi.org/10.4161/rna.27427>**

**[www.landesbioscience.com/journals/rnabiology/article/27427/](http://www.landesbioscience.com/journals/rnabiology/article/27427/)**

## Supplementary Figure Legends.

**Supplementary figure 1.** Protein sequence alignment of full length mammalian RPL39L and RPL39. A conserved R to Q amino acid change is observed among all the mammalian RPL39L shown compared to the RPL39. The corresponding residues are highlighted in yellow. Asterisks represent identical amino acid residue between 2 proteins, and colons represent similarity. Dots mean that semi-conserved substitutions are observed. All sequences were retrieved from either NCBI or Ensembl.

**Supplementary figure 2.** Expression variation of the 2 clusters of ribosomal protein genes across different human tissues. The 89 ribosomal protein mRNAs were categorized into 2 clusters, corresponding to stably or heterogeneously expressed groups, as suggested by hierarchical clustering. Boxplots show the 2<sup>nd</sup> and 3<sup>rd</sup> quartiles with the median of expression variations and the whiskers show the maximum and minimum values.

**Supplementary figure 3.** Protein sequence alignment of human RPs and their paralogs. The 8 human RPs (RPL10, RPL22, RPL26, RPL36A, RPS27, RPL7, RPL30 and RPL39) show high sequence similarity with their paralogs. The protein sequence similarities are shown. Asterisks represent identical amino acid residue between 2 proteins, and colons represent similarity. Dots mean that semi-conserved substitutions are observed. All protein sequences were retrieved from either NCBI or UCSC human genome browser.

**Supplementary figure 4.** Similarity analysis for promoter sequences of original RPs and their paralogs across different species. **Boxplots show the 2nd and 3rd quartiles with the median and the whiskers show the maximum and minimum values. Open circles represent outliers.**

**Supplementary Table 1.** RPKM-normalized RNA-seq data of RP transcripts, housekeeping genes and pluripotency markers in ESCs and NPCs.

**Supplementary Table 2.** Normalised expression levels (**log2**) of all RPs analysed by qRT-PCR across 22 different tissues.

**Supplementary Table 3.** Evolutionary stage and expression variation of ribosomal protein mRNAs examined.

## Supplementary Figure Legends.

**Supplementary figure 1.** Protein sequence alignment of full length mammalian RPL39L and RPL39. A conserved R to Q amino acid change is observed among all the mammalian RPL39L shown compared to the RPL39. The corresponding residues are highlighted in yellow. Asterisks represent identical amino acid residue between 2 proteins, and colons represent similarity. Dots mean that semi-conserved substitutions are observed. All sequences were retrieved from either NCBI or Ensembl.

**Supplementary figure 2.** Expression variation of the 2 clusters of ribosomal protein genes across different human tissues. The 89 ribosomal protein mRNAs were categorized into 2 clusters, corresponding to stably or heterogeneously expressed groups, as suggested by hierarchical clustering. Boxplots show the 2<sup>nd</sup> and 3<sup>rd</sup> quartiles with the median of expression variations and the whiskers show the maximum and minimum values.

**Supplementary figure 3.** Protein sequence alignment of human RPs and their paralogs. The 8 human RPs (RPL10, RPL22, RPL26, RPL36A, RPS27, RPL7, RPL30 and RPL39) show high sequence similarity with their paralogs. The protein sequence similarities are shown. Asterisks represent identical amino acid residue between 2 proteins, and colons represent similarity. Dots mean that semi-conserved substitutions are observed. All protein sequences were retrieved from either NCBI or UCSC human genome browser.

**Supplementary figure 4.** Similarity analysis for promoter sequences of original RPs and their paralogs across different species. Boxplots show the 2<sup>nd</sup> and 3<sup>rd</sup> quartiles with the median and the whiskers show the maximum and minimum values. Open circles represent outliers.

**Supplementary Table 1.** RPKM-normalized RNA-seq data of RP transcripts, housekeeping genes and pluripotency markers in ESCs and NPCs.

**Supplementary Table 2.** Normalised expression levels (log<sub>2</sub>) of all RPs analysed by qRT-PCR across 22 different tissues.

**Supplementary Table 3.** Evolutionary stage and expression variation of ribosomal protein mRNAs examined.

```

Rat.RPL39L      -MASHKTFRIKRFLAKKQKQNRPIPWIMKMTGNKIMYNSKRRHWRRTKLGL----- 51
Mouse.RPL39L   -MASHKTFRIKRFLAKKQKQNRPIPWIMKMTGNKIMYNSKRRHWRRTKLGL----- 51
Microbat.RPL39L -MSSHKIFRIIRFLAKKQKQNWPIPWIMKMTGNKISYNSKRRHWRRTKLGL----- 51
Human.RPL39L   -MSSHKTFTIKRFLAKKQKQNRPIPWIMKPGSKIRYNSKRRHWRRTKLGL----- 51
Chimpanzee.RPL39L -MSSHKTFTIKRFLAKKQKQNRPIPWIMKPGSKIRSNSKRRHWRRTKLGL----- 51
Orangutan.RPL39L -MSSHKTFTIKRFLAKKQKQNRPIPWIMKPGNKIRHNSKRRHWRRTKLGL----- 51
Macaque.RPL39L  -MSSHKTFTIKRFLAKKQKQNRPIPWIMKPGNKIRYNSKRRHWRRTKLGL----- 51
Gorilla.RPL39L -MSSHKTFTIKRFLAKKQKQNRPIPWIMKPGNKIRYNSKRRHWRRTKLGL----- 51
Marmoset.RPL39L -MSSHKTFTIKRFLAKKQKQNRPIPWIMKMTGNKIRYNSKRRHWRRTKLGL----- 51
Elephant.RPL39L -MSSHKTFKIKRFLAKKQKQNRPIPWIMKMTGNKIRYNAKRRHWRRTKLGL----- 51

Marmoset.RPL39 -MSSHKTFTIKRFLAKKQKQNRPIPWIMKMTGNKIRYNSKRRHWRRTKLGL----- 51
Microbat.RPL39 TSSHKTFTIKRFLAKKQKQNRPIPWIMKMTGNKIRYNSKRRHWRRTKLGL----- 52
Macaque.RPL39  -MSSHKTFTIKRFLAKKQKQNRPIPWIMKMTGNKIRYNSKRRHWRRTKLGL----- 51
Elephant.RPL39 -MSSHKTFTIKRFLAKKQKQNRPIPWIMKMTGNKIRYNSKRRHWRRTKLGL----- 51
Orangutan.RPL39 -MSSHKTFTIKRFLAKKQKQNRPIPWIMKMTGNKIRYNSKRRHWRRTKLGL----- 50
Gorilla.RPL39  -MSSHKTFTIKRFLAKKQKQNRPIPWIMKMTGNKIRYNSKRRHWRRTKLGL----- 50
Rat.RPL39      -MSSHKTFTIKRFLAKKQKQNRPIPWIMKMTGNKIRYNSKRRHWRRTKLGL----- 50
Mouse.RPL39    -MSSHKTFTIKRFLAKKQKQNRPIPWIMKMTGNKIRYNSKRRHWRRTKLGL----- 50
Human.RPL39    -MSSHKTFTIKRFLAKKQKQNRPIPWIMKMTGNKIRYNSKRRHWRRTKLGL----- 50
Chimpanzee.RPL39 -MSSHKTFTIKRFLAKKQKQNRHIPWIMKMTGNKS-VQLQKETLEKNQAGSIRNCT 55
*:*** * *:***** *****:*.*. * : :. . : : *

```

Supplementary figure 1. Protein sequence alignment of full length mammalian RPL39L and RPL39.

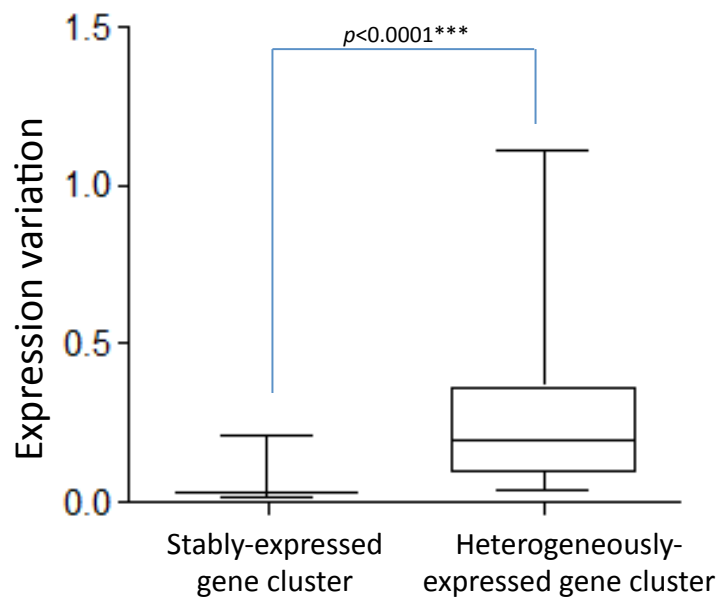

Supplementary figure 2. Expression variation of the 2 clusters of ribosomal protein genes across different human tissues.





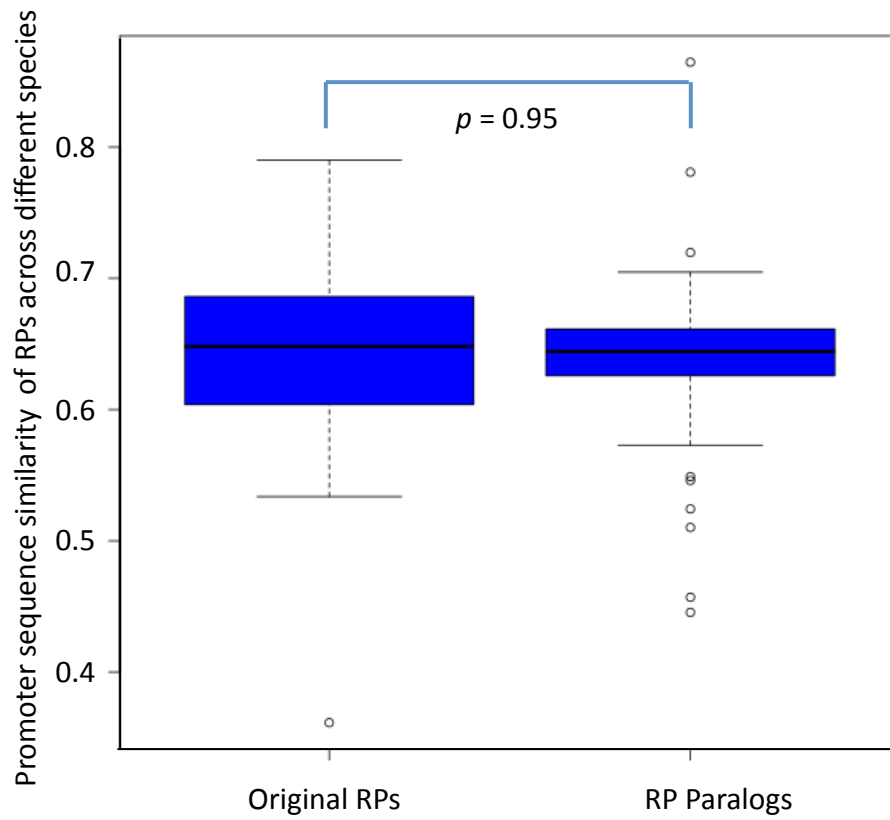

Supplementary figure 4. Similarity analysis for promoter sequences of original RPs and their paralogs across different species.



**Supplementary Table 1.** RPKM-normalized RNA-seq data of RP transcripts, housekeeping genes and pluripotency markers in ESCs and NPCs.

| Transcript   | Gene symbol  | RPKM ESC | RPKM NPC | Fold change (ESC/NPC) | Log2 Fold Change |
|--------------|--------------|----------|----------|-----------------------|------------------|
| NM_001162933 | Rpl10l       | 37.326   | 0.520    | 71.802                | 6.166            |
| NM_026594    | Rpl39l       | 25.981   | 1.759    | 14.774                | 3.885            |
| NR_003634    | Rps4y2       | 134.804  | 18.481   | 7.294                 | 2.867            |
| NM_001163945 | Rpl3l        | 0.199    | 0.064    | 3.128                 | 1.645            |
| NM_001163485 | Rpl30 var 2  | 15.608   | 5.220    | 2.990                 | 1.580            |
| NM_021338    | Rpl35a var 1 | 21.685   | 8.844    | 2.452                 | 1.294            |
| NM_001252218 | Rpl31 var 1  | 12.502   | 5.796    | 2.157                 | 1.109            |
| NM_207634    | Rps24 var 2  | 288.779  | 137.845  | 2.095                 | 1.067            |
| NM_025433    | Rpl7l1       | 67.512   | 33.537   | 2.013                 | 1.009            |
| NM_025589    | Rpl36al      | 219.798  | 115.235  | 1.907                 | 0.932            |
| NM_025974    | Rpl14        | 27.073   | 15.734   | 1.721                 | 0.783            |
| NM_009081    | Rpl28        | 0.500    | 0.467    | 1.072                 | 0.100            |
| NM_001159483 | Rpl19 var 2  | 128.304  | 80.651   | 1.591                 | 0.670            |
| NM_001033865 | Rps27a var 2 | 62.768   | 42.565   | 1.475                 | 0.560            |
| NM_009083    | Rpl30 var 1  | 13.613   | 9.010    | 1.511                 | 0.595            |
| NM_012053    | Rpl8         | 400.377  | 265.989  | 1.505                 | 0.590            |
| NM_009438    | Rpl13a       | 384.156  | 257.513  | 1.492                 | 0.577            |
| NM_019647    | Rpl21        | 49.260   | 33.423   | 1.474                 | 0.560            |
| NM_023372    | Rpl38 var 2  | 3.134    | 2.871    | 1.091                 | 0.126            |
| NM_026020    | Rplp2        | 135.001  | 93.438   | 1.445                 | 0.531            |
| NM_001005859 | Rpl34 var 2  | 46.358   | 34.235   | 1.354                 | 0.437            |
| NM_009095    | Rps5         | 854.674  | 604.501  | 1.414                 | 0.500            |
| NM_025586    | Rpl15        | 79.186   | 57.782   | 1.370                 | 0.455            |
| NM_011290    | Rpl6         | 108.488  | 79.689   | 1.361                 | 0.445            |
| NM_011975    | Rpl27a       | 30.589   | 22.577   | 1.355                 | 0.438            |
| NM_018853    | Rplp1        | 621.147  | 462.672  | 1.343                 | 0.425            |
| NM_026069    | Rpl37        | 162.325  | 122.444  | 1.326                 | 0.407            |
| NM_016959    | Rps3a        | 83.523   | 63.582   | 1.314                 | 0.394            |
| NM_024175    | Rps23        | 237.628  | 179.919  | 1.321                 | 0.401            |
| NM_029751    | Rpl18a       | 134.547  | 103.398  | 1.301                 | 0.380            |
| NM_007475    | Rplp0        | 301.216  | 235.447  | 1.279                 | 0.355            |
| NM_013725    | Rps11        | 207.921  | 162.734  | 1.278                 | 0.354            |
| NM_011295    | Rps12        | 82.526   | 64.816   | 1.273                 | 0.349            |
| NM_001130484 | Rpl35a var 2 | 43.468   | 34.907   | 1.245                 | 0.316            |
| NM_009078    | Rpl19 var 1  | 244.819  | 193.527  | 1.265                 | 0.339            |
| NM_013721    | Rpl7a        | 136.836  | 108.534  | 1.261                 | 0.334            |
| NM_026533    | Rps13        | 86.098   | 68.598   | 1.255                 | 0.328            |
| NM_024218    | Rpl24        | 288.743  | 230.255  | 1.254                 | 0.327            |
| NM_011292    | Rpl9         | 63.196   | 51.185   | 1.235                 | 0.304            |
| NM_009092    | Rps17        | 358.679  | 290.494  | 1.235                 | 0.304            |
| NM_009077    | Rpl18        | 43.613   | 35.801   | 1.218                 | 0.285            |
| NM_011289    | Rpl27        | 105.292  | 85.931   | 1.225                 | 0.293            |
| NM_026724    | Rpl34 var 1  | 8.949    | 7.237    | 1.237                 | 0.306            |
| NM_011287    | Rpl10a       | 539.459  | 442.378  | 1.219                 | 0.286            |
| NM_009076    | Rpl12        | 168.409  | 138.509  | 1.216                 | 0.282            |
| NM_009080    | Rpl26        | 116.317  | 96.661   | 1.203                 | 0.267            |
| NM_016738    | Rpl13        | 49.529   | 41.068   | 1.206                 | 0.270            |
| NM_025587    | Rps21        | 232.528  | 193.540  | 1.201                 | 0.265            |
| NM_009093    | Rps29        | 219.265  | 183.496  | 1.195                 | 0.257            |
| NM_026147    | Rps20        | 457.655  | 387.402  | 1.181                 | 0.240            |
| NM_020600    | Rps14        | 455.565  | 386.798  | 1.178                 | 0.236            |

**Supplementary Table 1 continued.** RPKM-normalized RNA-seq data of RP transcripts, housekeeping genes and pluripotency markers in ESCs and NPCs.

|              |              |          |          |        |        |
|--------------|--------------|----------|----------|--------|--------|
| NM_026467    | Rps27l       | 212.252  | 180.917  | 1.173  | 0.230  |
| NM_012052    | Rps3         | 386.921  | 331.057  | 1.169  | 0.225  |
| NM_009091    | Rps15        | 537.714  | 463.228  | 1.161  | 0.215  |
| NM_025919    | Rpl11        | 76.003   | 66.217   | 1.148  | 0.199  |
| NM_011029    | Rpsa         | 67.131   | 58.555   | 1.146  | 0.197  |
| NM_018730    | Rpl36        | 110.682  | 96.844   | 1.143  | 0.193  |
| NM_027015    | Rps27 var 1  | 69.076   | 60.692   | 1.138  | 0.187  |
| NM_011291    | Rpl7         | 393.532  | 347.191  | 1.133  | 0.181  |
| NM_029767    | Rps9         | 657.147  | 587.831  | 1.118  | 0.161  |
| NM_170669    | Rps15a       | 35.648   | 32.176   | 1.108  | 0.148  |
| NM_013647    | Rps16        | 119.829  | 107.404  | 1.116  | 0.158  |
| NM_011296    | Rps18        | 56.816   | 51.273   | 1.108  | 0.148  |
| NM_026517    | Rpl22l1      | 188.587  | 172.381  | 1.094  | 0.130  |
| NM_207523    | Rpl23a       | 236.011  | 214.961  | 1.098  | 0.135  |
| NM_024266    | Rps25        | 69.465   | 63.387   | 1.096  | 0.132  |
| NM_016980    | Rpl5         | 184.700  | 170.722  | 1.082  | 0.114  |
| NM_001048058 | Rpl38 var 3  | 329.762  | 304.612  | 1.083  | 0.114  |
| NM_008503    | Rps2         | 115.204  | 106.457  | 1.082  | 0.114  |
| NM_022891    | Rpl23        | 591.187  | 552.643  | 1.070  | 0.097  |
| NM_013762    | Rpl3         | 221.973  | 207.303  | 1.071  | 0.099  |
| NM_009096    | Rps6         | 42.067   | 39.545   | 1.064  | 0.089  |
| NM_009084    | Rpl37a       | 42.482   | 39.961   | 1.063  | 0.088  |
| NM_011300    | Rps7         | 165.311  | 156.092  | 1.059  | 0.083  |
| NM_025592    | Rpl35        | 83.543   | 79.820   | 1.047  | 0.066  |
| NM_016844    | Rps28        | 35.643   | 34.406   | 1.036  | 0.051  |
| NM_013765    | Rps26        | 297.884  | 287.961  | 1.034  | 0.049  |
| NM_024212    | Rpl4         | 589.666  | 588.250  | 1.002  | 0.003  |
| NM_025963    | Rps10        | 134.537  | 136.081  | 0.989  | -0.016 |
| NM_009098    | Rps8         | 92.300   | 93.471   | 0.987  | -0.018 |
| NM_009079    | Rpl22        | 112.681  | 115.407  | 0.976  | -0.034 |
| NM_009094    | Rps4x        | 103.883  | 107.649  | 0.965  | -0.051 |
| NM_023133    | Rps19        | 63.113   | 65.477   | 0.964  | -0.053 |
| NM_009082    | Rpl29        | 12.414   | 12.992   | 0.956  | -0.066 |
| NM_172086    | Rpl32        | 1034.820 | 1087.300 | 0.952  | -0.071 |
| NM_018860    | Rpl41        | 619.042  | 674.364  | 0.918  | -0.123 |
| NM_052835    | Rpl10        | 9.585    | 10.562   | 0.908  | -0.140 |
| NM_019865    | Rpl36a       | 3.998    | 4.524    | 0.884  | -0.178 |
| NM_001002239 | Rpl17        | 118.102  | 135.805  | 0.870  | -0.201 |
| NM_024277    | Rps27a var 1 | 291.456  | 351.353  | 0.830  | -0.270 |
| NM_053257    | Rpl31 var 3  | 60.953   | 74.325   | 0.820  | -0.286 |
| NM_026055    | Rpl39        | 201.707  | 254.678  | 0.792  | -0.336 |
| NM_207635    | Rps24 var 3  | 1.394    | 1.872    | 0.744  | -0.426 |
| NM_001130485 | Rpl35a var 3 | 28.846   | 40.156   | 0.718  | -0.477 |
| NM_001048057 | Rpl38 var 1  | 26.343   | 41.638   | 0.633  | -0.660 |
| NR_033727    | Rps27 var 2  | 2.427    | 3.656    | 0.664  | -0.592 |
| NM_001252219 | Rpl31 var 2  | 2.683    | 5.112    | 0.525  | -0.930 |
| NM_011297    | Rps24 var 1  | 24.324   | 89.461   | 0.272  | -1.879 |
| NM_008084    | Gapdh        | 105.534  | 141.752  | 0.744  | -0.426 |
| NM_008907    | Ppia         | 504.451  | 404.085  | 1.248  | 0.320  |
| NM_011443    | Sox2         | 52.890   | 24.876   | 2.126  | 1.088  |
| NM_028016    | Nanog        | 205.002  | 13.505   | 15.180 | 3.924  |
| NM_013684    | Tbp          | 10.217   | 8.654    | 1.181  | 0.240  |

**Supplementary Table 2.** Normalized expression levels (log2) of all RPs analyzed by qRT-PCR across 22 different tissues.

| normalized expression level | Adipose | Bladder | Brain | Cervix | Colon | Esophagus | Heart | Kidney | Liver | Lung  | Ovary |
|-----------------------------|---------|---------|-------|--------|-------|-----------|-------|--------|-------|-------|-------|
| RPLP0                       | 11.02   | 10.67   | 9.98  | 11.36  | 11.06 | 11.42     | 10.76 | 11.09  | 11.45 | 11.28 | 10.93 |
| RPL2B                       | 10.00   | 9.87    | 10.23 | 10.38  | 10.13 | 9.67      | 10.31 | 9.67   | 9.87  | 10.23 | 10.08 |
| RPL3                        | 10.64   | 10.59   | 10.89 | 11.05  | 10.61 | 10.62     | 9.58  | 10.58  | 10.47 | 10.64 | 11.48 |
| RPL4                        | 11.06   | 10.96   | 10.99 | 10.90  | 10.69 | 10.79     | 10.85 | 10.45  | 10.59 | 10.63 | 11.08 |
| RPL5                        | 10.34   | 10.59   | 10.19 | 10.33  | 10.82 | 10.08     | 10.21 | 10.11  | 9.83  | 10.14 | 10.66 |
| RPL6                        | 9.56    | 9.44    | 9.69  | 9.63   | 9.76  | 9.57      | 9.40  | 9.51   | 9.54  | 9.18  | 9.36  |
| RPL6 var1                   | 2.82    | 1.92    | 4.79  | 3.64   | 2.40  | 3.06      | 3.17  | 4.02   | 4.24  | 2.78  | 2.89  |
| RPL7                        | 10.42   | 10.47   | 10.28 | 10.15  | 10.56 | 10.04     | 10.23 | 10.07  | 9.87  | 9.97  | 10.29 |
| RPL7A                       | 10.50   | 10.28   | 10.55 | 10.46  | 10.65 | 10.56     | 10.13 | 10.41  | 10.47 | 10.19 | 10.72 |
| RPL7L1                      | 4.93    | 4.18    | 5.90  | 4.34   | 4.48  | 3.83      | 4.86  | 4.90   | 5.61  | 3.48  | 3.61  |
| RPL8                        | 9.67    | 9.78    | 9.56  | 9.69   | 9.96  | 9.71      | 9.75  | 9.68   | 9.50  | 9.70  | 9.98  |
| RPL9                        | 10.92   | 10.76   | 10.55 | 10.56  | 11.18 | 10.37     | 10.39 | 10.59  | 10.19 | 10.63 | 10.75 |
| RPL10                       | 9.91    | 9.27    | 9.22  | 9.41   | 9.76  | 9.17      | 9.64  | 9.40   | 9.15  | 9.48  | 9.83  |
| RPL10L                      | 4.48    | 4.58    | 4.48  | 3.80   | 4.35  | 4.36      | 4.32  | 3.71   | 3.77  | 4.26  | 4.57  |
| RPL10A                      | 8.79    | 9.43    | 9.02  | 9.44   | 9.44  | 9.21      | 8.83  | 8.93   | 8.72  | 8.88  | 9.26  |
| RPL11                       | 11.47   | 11.23   | 10.99 | 11.54  | 11.58 | 11.23     | 11.16 | 10.87  | 10.77 | 11.37 | 11.20 |
| RPL12                       | 9.34    | 9.50    | 8.83  | 9.75   | 9.69  | 9.45      | 8.98  | 9.09   | 9.11  | 9.45  | 9.31  |
| RPL13                       | 6.26    | 6.67    | 6.11  | 6.57   | 6.43  | 6.41      | 5.89  | 5.62   | 5.34  | 5.99  | 6.19  |
| RPL13A                      | 10.73   | 10.81   | 10.72 | 11.16  | 11.02 | 10.73     | 10.91 | 10.73  | 10.46 | 10.74 | 11.00 |
| RPL14                       | 9.29    | 9.25    | 9.26  | 9.37   | 9.39  | 9.19      | 9.43  | 9.11   | 8.96  | 9.06  | 9.20  |
| RPL15                       | 8.53    | 8.57    | 9.13  | 8.83   | 8.83  | 8.49      | 8.86  | 8.82   | 8.47  | 8.52  | 8.62  |
| RPL17                       | 10.82   | 11.29   | 10.95 | 11.27  | 11.47 | 11.10     | 11.01 | 11.30  | 10.78 | 11.62 | 10.73 |
| RPL18                       | 10.86   | 10.96   | 11.02 | 11.40  | 11.11 | 11.17     | 10.33 | 10.44  | 10.43 | 11.05 | 10.79 |
| RPL18A                      | 10.64   | 10.46   | 10.10 | 10.68  | 10.63 | 10.84     | 10.40 | 10.30  | 10.43 | 10.93 | 10.59 |
| RPL19                       | 10.43   | 10.16   | 10.30 | 10.24  | 10.37 | 10.09     | 10.49 | 10.38  | 10.10 | 10.53 | 10.12 |
| RPL21                       | 12.21   | 12.65   | 12.89 | 12.77  | 13.00 | 12.54     | 12.74 | 12.60  | 12.44 | 13.29 | 12.47 |
| RPL22                       | 10.18   | 10.20   | 10.34 | 10.35  | 10.48 | 10.07     | 10.29 | 10.13  | 9.69  | 10.44 | 9.93  |
| RPL22L                      | 9.15    | 8.91    | 9.30  | 9.06   | 9.18  | 9.59      | 9.40  | 9.29   | 11.09 | 9.91  | 8.49  |
| RPL23                       | 10.44   | 10.30   | 9.92  | 10.15  | 10.39 | 9.94      | 10.44 | 10.12  | 9.72  | 10.63 | 10.11 |
| RPL23A                      | 11.15   | 11.02   | 11.66 | 11.36  | 11.17 | 11.04     | 11.45 | 10.85  | 10.92 | 10.99 | 11.03 |
| RPL24                       | 9.31    | 9.26    | 9.94  | 9.51   | 9.61  | 9.32      | 9.80  | 9.34   | 9.21  | 9.41  | 9.19  |
| RPL26                       | 10.15   | 9.81    | 10.32 | 10.07  | 10.24 | 10.08     | 10.27 | 9.70   | 9.47  | 9.95  | 9.54  |
| RPL26L1                     | 3.97    | 3.09    | 5.48  | 3.73   | 3.39  | 3.85      | 5.29  | 5.34   | 4.88  | 3.60  | 3.24  |
| RPL27                       | 9.05    | 8.63    | 8.94  | 8.83   | 8.96  | 8.79      | 9.22  | 8.67   | 8.68  | 8.91  | 8.34  |
| RPL27A                      | 7.03    | 6.66    | 6.89  | 7.09   | 7.02  | 6.96      | 6.93  | 6.61   | 6.48  | 7.05  | 6.67  |
| RPL28                       | 10.88   | 10.34   | 11.29 | 10.99  | 10.67 | 11.21     | 10.52 | 10.72  | 11.04 | 11.05 | 10.44 |
| RPL29                       | 12.71   | 12.17   | 12.28 | 12.62  | 12.58 | 12.88     | 12.83 | 12.49  | 12.24 | 12.31 | 12.40 |
| RPL30                       | 10.76   | 10.37   | 10.21 | 10.30  | 10.47 | 10.04     | 10.56 | 10.21  | 10.33 | 10.68 | 10.82 |
| RPL30L (LOC100652953)       | 10.46   | 9.99    | 10.12 | 9.73   | 10.57 | 9.68      | 10.17 | 9.82   | 9.33  | 10.01 | 9.90  |
| RPL31                       | 9.86    | 9.82    | 9.97  | 9.67   | 9.94  | 9.54      | 9.78  | 9.86   | 9.33  | 10.06 | 9.97  |
| RRPL13L                     | 1.56    | 1.06    | 3.79  | 1.68   | 1.06  | 0.58      | 1.38  | 3.30   | 1.43  | 2.90  | 1.39  |
| RPL32                       | 11.07   | 10.66   | 10.61 | 10.70  | 10.79 | 10.60     | 10.63 | 10.61  | 10.71 | 10.96 | 10.96 |
| RPL34                       | 2.22    | 2.32    | 3.11  | 2.07   | 2.54  | 2.09      | 2.96  | 3.74   | 3.14  | 2.78  | 2.34  |
| RPL35                       | 9.53    | 9.27    | 9.24  | 9.48   | 9.64  | 9.43      | 9.31  | 9.61   | 9.70  | 9.65  | 9.35  |

**Supplementary Table 2 continued.** Normalized expression levels (log<sub>2</sub>) of all RPs analyzed by qRT-PCR across 22 different tissues.

| normalized expression level | Placenta | Prostate | Skeletal muscle | Small intestine | Spleen | Testes | Thymus | Thyroid | Trachea | Skin  | H7.514 hES |
|-----------------------------|----------|----------|-----------------|-----------------|--------|--------|--------|---------|---------|-------|------------|
| RPLP0                       | 11.28    | 11.33    | 11.43           | 11.44           | 11.07  | 11.12  | 11.07  | 11.01   | 11.18   | 11.07 | 11.54      |
| RPL2B                       | 10.46    | 10.13    | 10.18           | 9.68            | 10.39  | 10.14  | 10.42  | 9.67    | 10.23   | 9.72  | 10.04      |
| RPL3                        | 10.39    | 11.09    | 9.59            | 10.96           | 10.57  | 10.88  | 10.68  | 10.79   | 11.03   | 11.44 | 11.28      |
| RPL4                        | 10.06    | 10.79    | 11.12           | 10.60           | 10.44  | 10.70  | 10.92  | 10.69   | 10.89   | 10.85 | 10.70      |
| RPL5                        | 10.24    | 10.53    | 9.82            | 10.53           | 10.14  | 10.32  | 10.50  | 10.91   | 10.26   | 10.62 | 10.79      |
| RPL6                        | 9.44     | 9.76     | 9.24            | 9.67            | 8.96   | 8.89   | 9.47   | 10.02   | 9.57    | 10.10 | 10.15      |
| RPL6 var1                   | 4.23     | 2.98     | 3.49            | 3.33            | 3.30   | 4.13   | 3.33   | 3.14    | 4.14    | 3.96  | 6.41       |
| RPL7                        | 9.99     | 10.45    | 9.74            | 10.49           | 9.88   | 9.92   | 10.25  | 10.58   | 10.36   | 10.76 | 10.70      |
| RPL7A                       | 10.46    | 10.59    | 10.24           | 10.68           | 10.36  | 10.60  | 10.74  | 10.61   | 10.57   | 10.98 | 11.19      |
| RPL7L1                      | 5.05     | 4.47     | 4.18            | 4.52            | 4.06   | 4.59   | 4.78   | 4.78    | 4.64    | 3.82  | 5.37       |
| RPL8                        | 9.78     | 10.06    | 9.22            | 10.02           | 9.38   | 9.41   | 9.13   | 9.85    | 9.75    | 10.29 | 9.92       |
| RPL9                        | 10.52    | 10.90    | 10.07           | 11.01           | 10.81  | 10.46  | 10.34  | 11.17   | 10.67   | 10.89 | 10.73      |
| RPL10                       | 9.50     | 9.70     | 9.52            | 9.70            | 9.55   | 8.98   | 9.96   | 9.57    | 9.62    | 9.80  | 9.24       |
| RPL10L                      | 4.26     | 3.84     | 4.76            | 3.51            | 4.29   | 7.18   | 4.43   | 3.57    | 4.15    | 1.92  | 4.27       |
| RPL10A                      | 9.21     | 9.61     | 9.26            | 8.99            | 9.00   | 8.88   | 9.21   | 9.60    | 9.24    | 9.91  | 9.50       |
| RPL11                       | 11.09    | 11.80    | 11.23           | 11.37           | 11.09  | 10.99  | 11.02  | 11.49   | 11.63   | 11.62 | 11.18      |
| RPL12                       | 9.09     | 9.99     | 10.12           | 9.49            | 9.50   | 9.38   | 9.16   | 9.53    | 9.50    | 9.99  | 9.67       |
| RPL13                       | 5.28     | 6.71     | 6.67            | 6.09            | 6.26   | 6.61   | 7.57   | 6.71    | 7.08    | 7.07  | 6.95       |
| RPL13A                      | 10.91    | 11.10    | 11.19           | 11.03           | 11.02  | 10.89  | 10.83  | 11.10   | 11.06   | 11.66 | 11.33      |
| RPL14                       | 9.36     | 9.61     | 9.79            | 9.28            | 8.94   | 8.93   | 9.19   | 9.48    | 9.33    | 9.32  | 9.44       |
| RPL15                       | 8.88     | 8.91     | 9.16            | 8.57            | 8.76   | 9.34   | 9.08   | 9.27    | 8.85    | 9.01  | 9.37       |
| RPL17                       | 10.99    | 11.55    | 10.28           | 11.55           | 11.05  | 10.89  | 10.60  | 11.42   | 11.17   | 11.55 | 11.20      |
| RPL18                       | 10.91    | 11.18    | 10.59           | 11.48           | 10.81  | 10.98  | 11.36  | 11.24   | 11.33   | 12.08 | 10.92      |
| RPL18A                      | 10.54    | 10.73    | 10.67           | 10.79           | 10.78  | 10.56  | 11.15  | 10.69   | 10.61   | 11.56 | 10.78      |
| RPL19                       | 10.32    | 10.26    | 10.34           | 10.73           | 10.42  | 10.42  | 10.58  | 10.23   | 10.44   | 10.74 | 10.30      |
| RPL21                       | 12.59    | 12.89    | 12.33           | 12.84           | 12.76  | 12.26  | 12.53  | 12.70   | 12.74   | 12.63 | 12.07      |
| RPL22                       | 10.18    | 10.35    | 9.66            | 10.41           | 10.00  | 9.97   | 10.23  | 10.18   | 10.14   | 10.69 | 10.39      |
| RPL22L                      | 8.67     | 9.57     | 9.36            | 9.54            | 10.35  | 9.07   | 4.54   | 4.56    | 5.79    | 4.78  | 6.24       |
| RPL23                       | 10.24    | 10.30    | 9.79            | 10.13           | 10.07  | 9.96   | 10.04  | 10.13   | 10.13   | 10.64 | 10.27      |
| RPL23A                      | 11.45    | 11.02    | 11.39           | 11.52           | 11.37  | 11.24  | 11.75  | 10.98   | 11.16   | 11.62 | 11.19      |
| RPL24                       | 9.33     | 9.45     | 9.69            | 9.76            | 8.72   | 9.32   | 9.44   | 9.82    | 9.24    | 9.44  | 9.68       |
| RPL26                       | 9.95     | 10.03    | 10.02           | 10.42           | 9.99   | 9.79   | 9.78   | 10.03   | 9.93    | 10.23 | 9.54       |
| RPL26L1                     | 4.73     | 3.45     | 4.97            | 4.77            | 4.13   | 6.56   | 4.09   | 4.42    | 4.34    | 4.00  | 5.02       |
| RPL27                       | 9.10     | 8.44     | 9.28            | 8.95            | 8.98   | 8.78   | 8.95   | 8.65    | 8.62    | 9.34  | 8.74       |
| RPL27A                      | 7.24     | 6.85     | 7.01            | 7.41            | 7.17   | 6.65   | 6.81   | 7.10    | 6.89    | 7.49  | 7.35       |
| RPL28                       | 10.76    | 10.76    | 10.36           | 11.15           | 11.27  | 11.05  | 12.00  | 10.42   | 11.00   | 11.58 | 10.69      |
| RPL29                       | 12.20    | 12.31    | 13.33           | 13.05           | 12.65  | 12.55  | 12.71  | 12.49   | 12.52   | 13.21 | 12.67      |
| RPL30                       | 10.14    | 10.75    | 10.44           | 10.14           | 10.65  | 10.39  | 10.86  | 10.44   | 10.46   | 10.69 | 10.31      |
| RPL30L<br>(LOC100652953)    | 9.76     | 9.55     | 9.59            | 9.63            | 9.94   | 9.29   | 9.69   | 9.09    | 9.02    | 7.67  | 7.64       |
| RPL31                       | 9.38     | 10.15    | 9.46            | 9.43            | 9.70   | 9.57   | 9.89   | 9.71    | 9.69    | 9.79  | 9.23       |
| RRPL13L                     | 1.04     | 1.41     | 0.38            | 1.13            | 1.15   | 3.06   | 1.99   | 2.11    | 1.87    | 0.40  | 2.03       |
| RPL32                       | 10.41    | 11.11    | 11.06           | 10.47           | 10.86  | 10.77  | 11.18  | 10.47   | 10.80   | 11.02 | 10.39      |
| RPL34                       | 2.09     | 3.41     | 2.08            | 3.82            | 3.05   | 3.04   | 2.93   | 4.07    | 3.01    | 2.84  | 3.27       |
| RPL35                       | 8.95     | 9.70     | 9.94            | 9.21            | 9.57   | 9.35   | 9.37   | 9.36    | 9.53    | 9.91  | 9.62       |

**Supplementary Table 2 continued.** Normalized expression levels (log<sub>2</sub>) of all RPs analyzed by qRT-PCR across 22 different tissues.

| normalized expression level | Adipose | Bladder | Brain | Cervix | Colon | Esophagus | Heart | Kidney | Liver | Lung  | Ovary |
|-----------------------------|---------|---------|-------|--------|-------|-----------|-------|--------|-------|-------|-------|
| RPL35A                      | 9.10    | 8.90    | 8.63  | 8.85   | 9.11  | 8.63      | 9.20  | 8.91   | 8.23  | 9.16  | 9.35  |
| RPL36                       | 9.80    | 9.43    | 9.46  | 9.74   | 9.86  | 9.63      | 9.44  | 9.72   | 9.67  | 9.76  | 10.12 |
| RPL36A var1                 | 9.43    | 9.36    | 9.10  | 9.49   | 9.69  | 9.33      | 8.94  | 9.42   | 8.98  | 9.54  | 9.67  |
| RPL36A var2                 | 0.56    | 0.29    | 1.26  | 0.60   | 1.07  | 0.14      | 0.12  | 0.06   | 0.15  | 0.14  | 1.20  |
| RPL36AL                     | 8.72    | 9.12    | 9.27  | 8.78   | 8.72  | 8.50      | 9.06  | 9.08   | 9.60  | 8.75  | 9.16  |
| RPL37                       | 11.44   | 11.52   | 11.26 | 11.47  | 11.28 | 11.87     | 10.94 | 11.24  | 11.63 | 11.59 | 11.66 |
| RPL37A                      | 11.74   | 12.07   | 11.93 | 11.75  | 11.67 | 12.18     | 11.75 | 11.53  | 11.79 | 11.70 | 11.81 |
| RPL38                       | 6.26    | 6.33    | 6.80  | 5.78   | 6.00  | 6.20      | 6.96  | 6.21   | 6.84  | 6.23  | 6.35  |
| RPL39                       | 11.75   | 11.65   | 10.77 | 11.50  | 11.52 | 11.71     | 11.55 | 11.09  | 12.47 | 11.86 | 11.43 |
| RPL39L                      | 0.58    | 0.32    | 2.32  | 0.96   | 1.27  | 0.42      | 1.37  | 0.23   | 2.35  | 0.87  | 0.07  |
| RPL41                       | 4.03    | 4.21    | 5.88  | 3.57   | 4.01  | 3.89      | 5.48  | 4.81   | 5.04  | 3.82  | 3.49  |
| RPLP1                       | 12.40   | 12.70   | 11.73 | 12.49  | 12.30 | 12.72     | 12.65 | 12.09  | 12.59 | 12.47 | 12.68 |
| RPLP2                       | 12.29   | 11.79   | 11.13 | 11.38  | 11.51 | 11.67     | 11.28 | 11.28  | 11.56 | 11.81 | 11.82 |
| RPSA                        | 1.60    | 2.13    | 2.75  | 2.48   | 2.01  | 2.96      | 2.09  | 2.98   | 2.70  | 2.35  | 2.43  |
| RPS2                        | 11.55   | 11.91   | 10.87 | 11.71  | 11.62 | 12.28     | 11.28 | 11.45  | 12.78 | 11.85 | 11.90 |
| RPS3                        | 10.68   | 11.41   | 10.27 | 11.10  | 11.22 | 11.43     | 10.38 | 10.57  | 10.95 | 11.33 | 11.53 |
| RPS3A                       | 10.01   | 10.40   | 9.26  | 10.24  | 10.12 | 10.18     | 9.94  | 9.93   | 9.61  | 10.04 | 10.51 |
| RPS4X                       | 9.86    | 9.78    | 9.21  | 10.09  | 9.56  | 9.86      | 9.27  | 9.52   | 8.85  | 9.26  | 10.51 |
| RPS5                        | 5.12    | 5.47    | 4.38  | 5.11   | 4.75  | 5.49      | 4.88  | 5.02   | 5.74  | 4.90  | 5.93  |
| RPS6                        | 15.78   | 15.71   | 15.19 | 15.45  | 15.97 | 15.35     | 14.95 | 15.22  | 14.60 | 15.86 | 15.42 |
| RPS7                        | 11.18   | 11.39   | 10.76 | 11.05  | 11.30 | 11.52     | 11.12 | 11.38  | 11.60 | 11.16 | 11.30 |
| RPS8                        | 9.11    | 9.38    | 8.44  | 9.17   | 9.11  | 9.46      | 8.70  | 8.71   | 8.95  | 8.79  | 9.91  |
| RPS9                        | 10.23   | 10.54   | 9.74  | 10.14  | 9.99  | 10.38     | 9.86  | 10.33  | 10.35 | 10.25 | 10.47 |
| RPS10                       | 10.97   | 11.56   | 10.95 | 11.32  | 11.15 | 11.55     | 10.98 | 11.36  | 11.32 | 11.22 | 11.46 |
| RPS11                       | 12.66   | 12.83   | 12.22 | 12.55  | 12.35 | 12.52     | 12.24 | 12.53  | 12.47 | 12.50 | 12.74 |
| RPS12                       | 9.44    | 9.72    | 8.92  | 9.24   | 9.16  | 9.53      | 9.09  | 9.14   | 9.51  | 9.45  | 9.72  |
| RPS13                       | 9.62    | 9.81    | 9.01  | 9.25   | 9.19  | 9.49      | 9.64  | 9.52   | 9.38  | 9.15  | 9.63  |
| RPS14                       | 12.19   | 12.38   | 11.87 | 12.05  | 11.91 | 12.14     | 11.85 | 12.08  | 11.79 | 12.20 | 12.03 |
| RPS15                       | 4.75    | 4.66    | 6.10  | 5.13   | 4.20  | 5.32      | 5.61  | 5.88   | 5.98  | 4.43  | 4.41  |
| RPS15A                      | 9.55    | 9.74    | 8.44  | 9.44   | 9.28  | 9.57      | 9.39  | 9.26   | 9.45  | 9.42  | 9.55  |
| RPS16                       | 11.95   | 12.41   | 11.37 | 12.04  | 11.84 | 12.21     | 11.95 | 11.94  | 12.31 | 11.94 | 12.50 |
| RPS18                       | 10.99   | 11.25   | 10.34 | 11.30  | 10.67 | 11.40     | 10.47 | 10.56  | 10.80 | 10.96 | 11.45 |
| RPS19                       | 12.33   | 12.85   | 12.12 | 12.87  | 12.69 | 13.27     | 12.07 | 12.45  | 13.33 | 12.77 | 12.89 |
| RPS20                       | 9.76    | 9.54    | 8.79  | 9.24   | 9.13  | 9.25      | 9.23  | 9.04   | 9.12  | 9.35  | 9.60  |
| RPS21                       | 11.40   | 11.88   | 11.56 | 11.69  | 11.60 | 11.75     | 11.31 | 11.42  | 11.53 | 11.62 | 11.77 |
| RPS23                       | 12.40   | 12.82   | 12.32 | 12.50  | 12.27 | 12.45     | 12.64 | 12.31  | 12.09 | 12.37 | 12.91 |
| RPS24                       | 2.91    | 2.77    | 4.42  | 3.37   | 2.47  | 3.76      | 4.12  | 3.83   | 5.53  | 3.28  | 2.74  |
| RPS25                       | 11.57   | 12.05   | 11.33 | 11.50  | 11.63 | 11.67     | 11.68 | 11.31  | 11.54 | 11.50 | 11.48 |
| RPS26                       | 3.14    | 1.71    | 4.31  | 2.74   | 2.98  | 2.11      | 5.11  | 5.09   | 5.21  | 3.11  | 1.88  |
| RPS27                       | 11.65   | 11.90   | 11.17 | 11.79  | 11.79 | 11.65     | 11.34 | 11.66  | 11.48 | 11.84 | 11.71 |
| RPS27A                      | 11.44   | 11.72   | 11.46 | 11.35  | 11.46 | 11.39     | 11.30 | 11.42  | 11.41 | 11.08 | 11.46 |
| RPS27L                      | 7.41    | 7.48    | 6.86  | 6.02   | 7.25  | 6.62      | 8.34  | 8.09   | 7.45  | 6.86  | 5.99  |
| RPS28                       | 11.74   | 11.38   | 11.65 | 11.69  | 11.19 | 12.07     | 11.71 | 11.88  | 11.93 | 11.59 | 11.75 |
| RPS29 var1                  | 10.70   | 10.76   | 10.73 | 10.61  | 10.51 | 10.83     | 10.94 | 11.01  | 10.89 | 10.93 | 10.55 |
| RPS29 var2                  | 3.96    | 4.60    | 5.14  | 4.21   | 4.22  | 4.54      | 4.63  | 5.09   | 2.54  | 4.41  | 4.16  |

**Supplementary Table 2 continued.** Normalized expression levels (log2) of all RPs analyzed by qRT-PCR across 22 different tissues.

| normalized expression level | Placenta | Prostate | Skeletal muscle | Small intestine | Spleen | Testes | Thymus | Thyroid | Trachea | Skin  | H7.514 hES |
|-----------------------------|----------|----------|-----------------|-----------------|--------|--------|--------|---------|---------|-------|------------|
| RPL35A                      | 8.51     | 9.31     | 8.62            | 8.86            | 8.92   | 8.98   | 9.38   | 9.10    | 9.00    | 9.11  | 9.02       |
| RPL36                       | 9.30     | 10.29    | 9.50            | 9.68            | 9.70   | 9.65   | 9.69   | 9.24    | 9.92    | 10.32 | 9.63       |
| RPL36A var1                 | 9.02     | 9.82     | 9.29            | 9.41            | 9.64   | 8.82   | 9.59   | 8.78    | 9.61    | 10.13 | 9.62       |
| RPL36A var2                 | 0.83     | 0.20     | 0.20            | 0.43            | 0.66   | 0.20   | 0.48   | 0.20    | 0.50    | 2.28  | 0.08       |
| RPL36AL                     | 9.18     | 8.52     | 8.65            | 9.39            | 8.60   | 8.57   | 8.27   | 8.99    | 8.68    | 7.35  | 8.31       |
| RPL37                       | 11.64    | 11.32    | 11.16           | 11.08           | 11.58  | 10.84  | 11.45  | 11.40   | 11.45   | 11.47 | 10.67      |
| RPL37A                      | 11.80    | 11.55    | 11.81           | 11.10           | 11.62  | 11.69  | 11.44  | 11.75   | 11.75   | 11.72 | 10.94      |
| RPL38                       | 6.33     | 5.91     | 6.88            | 6.05            | 5.35   | 6.81   | 6.40   | 6.66    | 6.43    | 5.42  | 6.24       |
| RPL39                       | 11.70    | 11.42    | 11.47           | 11.33           | 11.78  | 10.88  | 11.81  | 11.49   | 11.51   | 11.41 | 10.60      |
| RPL39L                      | 0.83     | 1.23     | 0.09            | 0.26            | 0.30   | 6.85   | 3.45   | 0.35    | 2.08    | 1.76  | 3.20       |
| RPL41                       | 4.62     | 3.49     | 5.63            | 3.91            | 3.05   | 5.16   | 3.40   | 4.64    | 4.14    | 2.89  | 4.57       |
| RPLP1                       | 12.45    | 12.15    | 13.30           | 12.15           | 12.37  | 11.98  | 12.55  | 12.21   | 12.42   | 12.87 | 11.69      |
| RPLP2                       | 11.87    | 11.33    | 11.62           | 11.35           | 11.83  | 11.31  | 11.88  | 11.29   | 11.54   | 11.46 | 10.78      |
| RPSA                        | 2.42     | 2.09     | 1.91            | 2.39            | 3.13   | 1.95   | 2.35   | 2.82    | 2.77    | 2.31  | 3.48       |
| RPS2                        | 11.89    | 11.57    | 11.92           | 11.47           | 12.07  | 11.48  | 11.89  | 11.54   | 11.77   | 12.21 | 11.96      |
| RPS3                        | 11.28    | 10.98    | 10.67           | 10.74           | 11.27  | 10.75  | 11.02  | 11.14   | 10.93   | 10.95 | 10.76      |
| RPS3A                       | 10.40    | 10.02    | 9.97            | 10.07           | 10.39  | 9.85   | 10.07  | 10.42   | 9.81    | 9.83  | 10.23      |
| RPS4X                       | 10.28    | 9.32     | 9.77            | 9.38            | 8.69   | 9.12   | 9.58   | 10.29   | 9.47    | 10.02 | 9.78       |
| RPS5                        | 5.53     | 5.06     | 5.59            | 4.54            | 5.11   | 4.82   | 5.04   | 5.49    | 5.12    | 5.43  | 5.41       |
| RPS6                        | 14.98    | 16.09    | 15.17           | 15.30           | 16.14  | 15.85  | 15.73  | 15.05   | 15.27   | 14.48 | 13.71      |
| RPS7                        | 11.88    | 11.14    | 10.97           | 11.03           | 11.38  | 10.95  | 10.94  | 11.31   | 11.05   | 10.97 | 11.27      |
| RPS8                        | 9.60     | 8.99     | 9.08            | 8.72            | 9.27   | 8.47   | 8.85   | 8.90    | 8.80    | 9.12  | 9.13       |
| RPS9                        | 9.97     | 10.39    | 10.11           | 10.21           | 10.62  | 9.89   | 10.18  | 10.28   | 10.34   | 10.47 | 9.77       |
| RPS10                       | 11.29    | 11.29    | 11.12           | 11.26           | 11.07  | 11.15  | 11.12  | 11.44   | 11.22   | 11.49 | 10.92      |
| RPS11                       | 12.71    | 12.61    | 12.62           | 12.32           | 12.86  | 12.28  | 12.53  | 12.48   | 12.48   | 12.57 | 11.80      |
| RPS12                       | 9.88     | 9.25     | 8.94            | 9.01            | 9.61   | 9.18   | 9.50   | 9.24    | 9.27    | 9.36  | 9.01       |
| RPS13                       | 9.91     | 9.10     | 9.92            | 9.11            | 9.30   | 8.96   | 9.49   | 9.36    | 9.29    | 9.16  | 8.96       |
| RPS14                       | 12.48    | 12.05    | 12.33           | 12.06           | 12.18  | 11.67  | 11.81  | 12.29   | 12.03   | 12.09 | 11.37      |
| RPS15                       | 5.39     | 4.21     | 5.13            | 4.70            | 4.97   | 5.44   | 4.97   | 5.01    | 5.29    | 4.55  | 6.72       |
| RPS15A                      | 9.60     | 9.31     | 9.71            | 9.35            | 9.80   | 9.01   | 9.72   | 9.41    | 9.23    | 9.18  | 8.89       |
| RPS16                       | 12.27    | 11.71    | 12.30           | 12.03           | 12.17  | 11.63  | 12.33  | 11.93   | 12.11   | 12.02 | 11.52      |
| RPS18                       | 10.85    | 10.87    | 10.63           | 10.85           | 10.71  | 10.70  | 10.86  | 10.66   | 10.91   | 11.40 | 10.43      |
| RPS19                       | 12.69    | 13.07    | 12.31           | 12.83           | 13.25  | 12.39  | 12.82  | 12.79   | 12.71   | 13.01 | 12.80      |
| RPS20                       | 9.20     | 9.25     | 9.08            | 8.85            | 9.35   | 9.08   | 9.32   | 8.94    | 9.16    | 8.83  | 9.00       |
| RPS21                       | 11.37    | 11.37    | 11.51           | 11.49           | 11.62  | 11.13  | 11.69  | 11.57   | 11.49   | 11.61 | 10.98      |
| RPS23                       | 12.54    | 12.15    | 12.86           | 12.26           | 12.68  | 11.92  | 12.54  | 12.37   | 12.42   | 12.15 | 12.35      |
| RPS24                       | 2.31     | 2.68     | 5.22            | 2.85            | 3.06   | 5.43   | 3.39   | 3.63    | 3.70    | 3.30  | 7.32       |
| RPS25                       | 11.36    | 11.48    | 11.93           | 11.51           | 11.55  | 11.16  | 11.26  | 11.23   | 11.52   | 11.30 | 11.17      |
| RPS26                       | 3.18     | 2.33     | 5.62            | 4.90            | 2.91   | 3.15   | 1.94   | 3.02    | 2.56    | 0.99  | 5.07       |
| RPS27                       | 11.45    | 11.80    | 11.44           | 11.45           | 11.60  | 11.32  | 11.68  | 11.66   | 11.76   | 11.54 | 10.71      |
| RPS27A                      | 11.39    | 11.20    | 10.52           | 11.15           | 11.55  | 10.80  | 10.86  | 11.62   | 11.53   | 11.29 | 11.28      |
| RPS27L                      | 7.06     | 6.83     | 6.86            | 7.99            | 6.48   | 6.31   | 5.54   | 7.35    | 6.87    | 5.96  | 6.47       |
| RPS28                       | 11.64    | 11.42    | 11.57           | 11.50           | 11.96  | 11.09  | 11.78  | 11.86   | 11.89   | 12.18 | 11.00      |
| RPS29 var1                  | 11.21    | 10.23    | 10.78           | 10.80           | 11.30  | 10.62  | 11.13  | 10.47   | 10.62   | 10.87 | 10.50      |
| RPS29 var2                  | 4.25     | 4.95     | 3.97            | 4.52            | 4.52   | 4.11   | 4.63   | 5.65    | 4.32    | 3.39  | 4.34       |

**Supplementary Table 3.** Evolutionary stage and expression variation of ribosomal protein mRNAs examined.

| RP gene     | Evolution Stage (1-6) | Expression Variation |
|-------------|-----------------------|----------------------|
| RPS10       | 1                     | 0.017                |
| RPL19       | 2                     | 0.018                |
| RPS21       | 2                     | 0.018                |
| RPS11       | 1                     | 0.019                |
| RPS25       | 3                     | 0.020                |
| RPS23       | 1                     | 0.020                |
| RPS14       | 1                     | 0.021                |
| RPL21       | 2                     | 0.022                |
| RPL32       | 2                     | 0.022                |
| RPL14       | 1                     | 0.023                |
| RPL4        | 1                     | 0.023                |
| RPS7        | 1                     | 0.023                |
| RPL30       | 1                     | 0.023                |
| RPL23A      | 3                     | 0.023                |
| RPL13A      | 3                     | 0.023                |
| RPL7A       | 3                     | 0.023                |
| RPL37A      | 1                     | 0.023                |
| RPS27       | 3                     | 0.023                |
| RPL23       | 1                     | 0.024                |
| RPS29 var 1 | 3                     | 0.024                |
| RPL11       | 1                     | 0.024                |
| RPS16       | 2                     | 0.024                |
| RPL22       | 1                     | 0.024                |
| RPS9        | 1                     | 0.024                |
| RPL35       | 2                     | 0.025                |
| RPS27A      | 4                     | 0.025                |
| RPL29       | 1                     | 0.025                |
| RPL37       | 3                     | 0.025                |
| RPL31       | 2                     | 0.025                |
| RPS28       | 3                     | 0.026                |
| RPL26       | 3                     | 0.026                |
| RPL2B       | 4                     | 0.026                |
| RPS20       | 2                     | 0.027                |
| RPS19       | 1                     | 0.027                |
| RPL9        | 2                     | 0.027                |
| RPL18A      | 3                     | 0.028                |
| RPL7        | 3                     | 0.028                |
| RPL10       | 1                     | 0.028                |
| RPLP2       | 1                     | 0.028                |
| RPL8        | 3                     | 0.028                |
| RPL36       | 2                     | 0.029                |
| RPS12       | 1                     | 0.029                |
| RPL5        | 1                     | 0.029                |
| RPL24       | 1                     | 0.029                |

|                          |   |       |
|--------------------------|---|-------|
| RPL27                    | 2 | 0.029 |
| RPS3A                    | 3 | 0.029 |
| RPLP1                    | 3 | 0.030 |
| RPS18                    | 2 | 0.030 |
| RPLP0                    | 1 | 0.031 |
| RPS3                     | 1 | 0.031 |
| RPS13                    | 1 | 0.031 |
| RPL17                    | 2 | 0.031 |
| RPL15                    | 1 | 0.032 |
| RPL35A                   | 3 | 0.032 |
| RPS2                     | 1 | 0.033 |
| RPS15A                   | 3 | 0.033 |
| RPL6                     | 1 | 0.033 |
| RPL10A                   | 3 | 0.034 |
| RPL39                    | 3 | 0.035 |
| RPL12                    | 1 | 0.035 |
| RPL18                    | 1 | 0.036 |
| RPL36A var 1             | 3 | 0.036 |
| RPL28                    | 2 | 0.038 |
| RPS6                     | 2 | 0.038 |
| RPL27A                   | 3 | 0.038 |
| RPS8                     | 1 | 0.039 |
| RPL3                     | 1 | 0.044 |
| RPS4X                    | 4 | 0.049 |
| RPL36AL                  | 6 | 0.054 |
| RPL38                    | 3 | 0.070 |
| RPS5                     | 1 | 0.075 |
| RPL30L<br>(LOC100652953) | 3 | 0.076 |
| RPL13                    | 1 | 0.088 |
| RPS27L                   | 6 | 0.105 |
| RPS15                    | 1 | 0.127 |
| RPL7L1                   | 5 | 0.135 |
| RPS29 var 2              | 6 | 0.143 |
| RPSA                     | 1 | 0.184 |
| RPL41                    | 4 | 0.194 |
| RPL26L1                  | 6 | 0.197 |
| RPL34                    | 2 | 0.207 |
| RPS26                    | 4 | 0.210 |
| RPL22L                   | 5 | 0.228 |
| RPL6 var 1               | 6 | 0.263 |
| RPS24                    | 3 | 0.326 |
| RPL10L                   | 4 | 0.403 |
| RPL13L                   | 6 | 0.547 |
| RPL36A var 2             | 6 | 1.010 |
| RPL39L                   | 5 | 1.106 |
